# Supplementary material for: Synthesis, crystal structure and magnetic properties of an oxalato-bridged ReIVMoVIheterobimetallic complex
Source: Royal Society of Chemistry journal article supplement (doi:10.1039/c0dt01323d), 2010-12-23
Supplement: c0dt01323d.pdf [file c0dt01323d.pdf]

## **Electronic Supplementary Information (ESI)**

### Synthesis, crystal structure and magnetic properties of an oxalato-bridged $\text{Re}^{\text{IV}}\text{Mo}^{\text{VI}}$ heterobimetallic complex

**José Martínez-Lillo,<sup>\*a,b</sup> Donatella Armentano,<sup>b</sup> Giovanni De Munno,<sup>\*b</sup> Francesc Lloret,<sup>a</sup> Miguel Julve<sup>a</sup> and Juan Faus<sup>\*a</sup>**

*a) Departamento de Química Inorgánica/Instituto de Ciencia Molecular, Facultad de Química de la Universidad de Valencia, Dr. Moliner 50, 46100, Burjassot, Valencia, Spain. E-mails: [juan.faus@uv.es](mailto:juan.faus@uv.es), [lillo@uv.es](mailto:lillo@uv.es)*

*b) Centro di Eccellenza CEMIF.CAL, Dipartimento di Chimica, Università della Calabria, via P. Bucci 14/c, 87030, Arcavacata di Rende (CS), Italy. E-mail: [demunno@unical.it](mailto:demunno@unical.it)*

#### **Preparation of compound 1.**

The precursor  $(\text{PPh}_4)_2[\text{ReCl}_4(\text{ox})]$  was prepared according to the literature procedure described for  $(\text{AsPh}_4)_2[\text{ReCl}_4(\text{ox})]$  but using  $\text{PPh}_4^+$  instead of  $\text{AsPh}_4^+$  (See Ref. 7a of the main text). Compound **1** was prepared by pouring a solution of  $(\text{PPh}_4)_2[\text{ReCl}_4(\text{ox})]$  (54.7 mg, 0.05 mmol) in 25 cm<sup>3</sup> of acetonitrile into another containing 13.6 mg (0.05 mmol) of  $\text{MoCl}_5$  in 25 cm<sup>3</sup> of ethyl acetate. X-ray suitable orange crystals of **1** were grown from the resulting orange-yellowish solution after three days by slow evaporation at room temperature. They were filtered off and washed with diethyl ether. The same compound was obtained by performing the synthesis under an argon atmosphere. Yield: *ca.* 52%. Found: C, 46.15; H, 2.97. Calc. for  $\text{C}_{50}\text{H}_{40}\text{Cl}_6\text{P}_2\text{O}_6\text{MoRe}$  (**1**): C, 46.43; H, 3.12. The Re:Mo molar ratio in **1** was found to be 1:1 by X-ray microanalysis on a microcrystalline sample. This Re:Mo molar ratio was determined by means of a Philips XL-30 scanning electron microscope (SEM) equipped with an X-ray microanalysis system from the Central Service for the Support to Experimental Research (SCSIE) of the University of Valencia. IR (KBr pellet / cm<sup>-1</sup>): bands associated to the oxalato ligand appear at 1656 vs ( $\nu_{\text{asCO}}$ ) and 813 s ( $\delta_{\text{OCO}}$ ). Compound **1** is soluble in common organic solvents such as acetone, acetonitrile or *N,N*-dimethylformamide at room temperature.

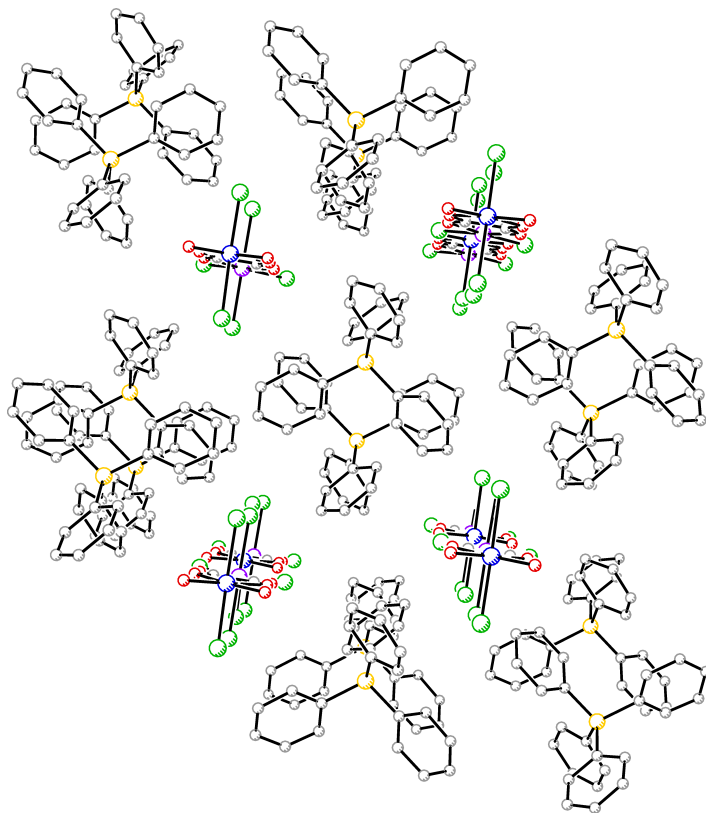

**Figure S1.** A view along the *b* axis of the packing in **1** showing the arrangement of the cations and anions.

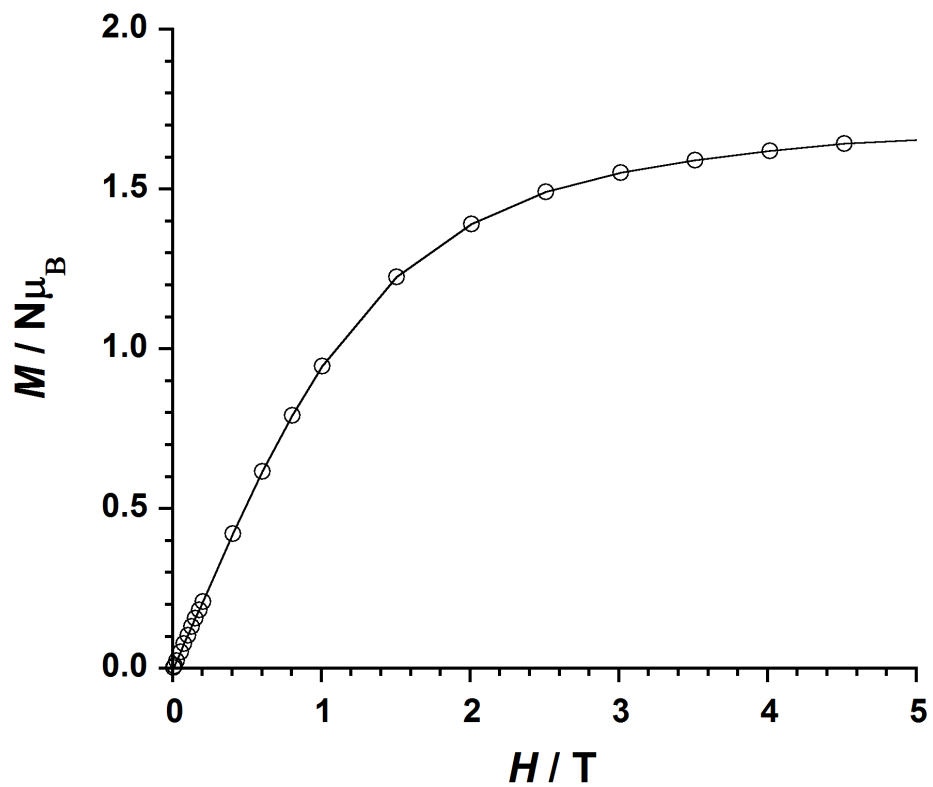

**Figure S2.** Field dependence of the magnetization at 2.0 K for **1** (the solid line is an eye guide).
